# Supplementary material for: Enhanced catalytic activity without the use of an external light source using microwave-synthesized CuO nanopetals
Source: publisher site journal article supplement (doi:10.3762/bjnano.8.118), 2017-05-30
Supplement: Additional file 1 [file 2190-4286-8-118-S1.pdf]

**Supporting Information**  
**for**  
**Enhanced catalytic activity without the use of an external  
light source using microwave-synthesized CuO nanopetals**

Govinda Lakhotiya<sup>\*1,2</sup>, Sonal Bajaj<sup>2</sup>, Arpan Kumar Nayak<sup>1</sup>, Debabrata Pradhan<sup>1</sup>, Pradip Tekade<sup>2</sup>  
and Abhimanyu Rana<sup>\*3</sup>

Address: <sup>1</sup>Material Science Center, Indian Institute of Technology Kharagpur, Kharagpur-  
721302, W.B., India, <sup>2</sup>Jankidevi Bajaj College of Science, Wardha-442001, M.S., India and  
<sup>3</sup>MESA+ Institute for Nanotechnology, University of Twente, 7500 AE, Enschede, Netherlands

Email: Abhimanyu Rana - rana.abhimanyu@gmail.com; Govinda Lakhotiya -  
lakhotiya.govinda@gmail.com

\*Corresponding author

**Additional Figures**

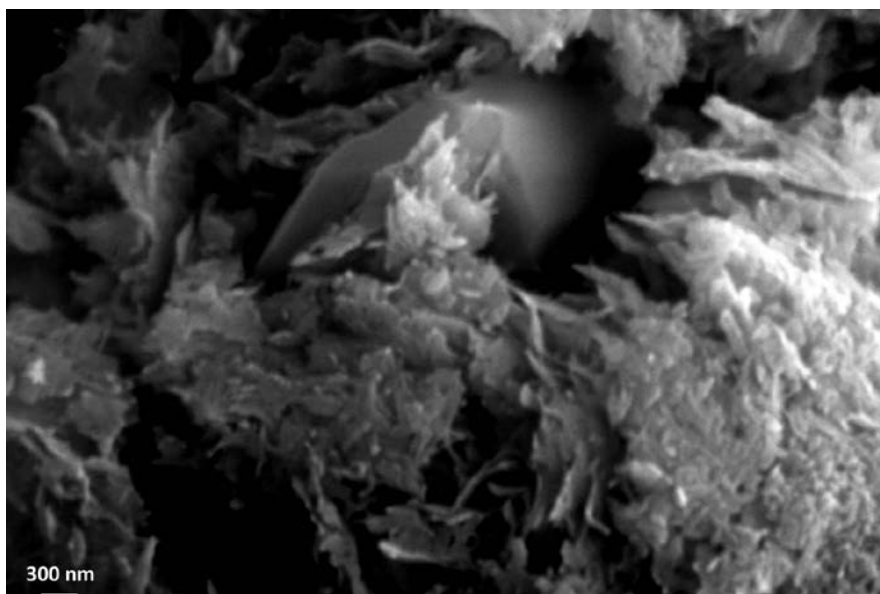

**Figure S1:** FESEM image of mixed phase CuO nanostructures obtained for the synthesis duration of 5 min.

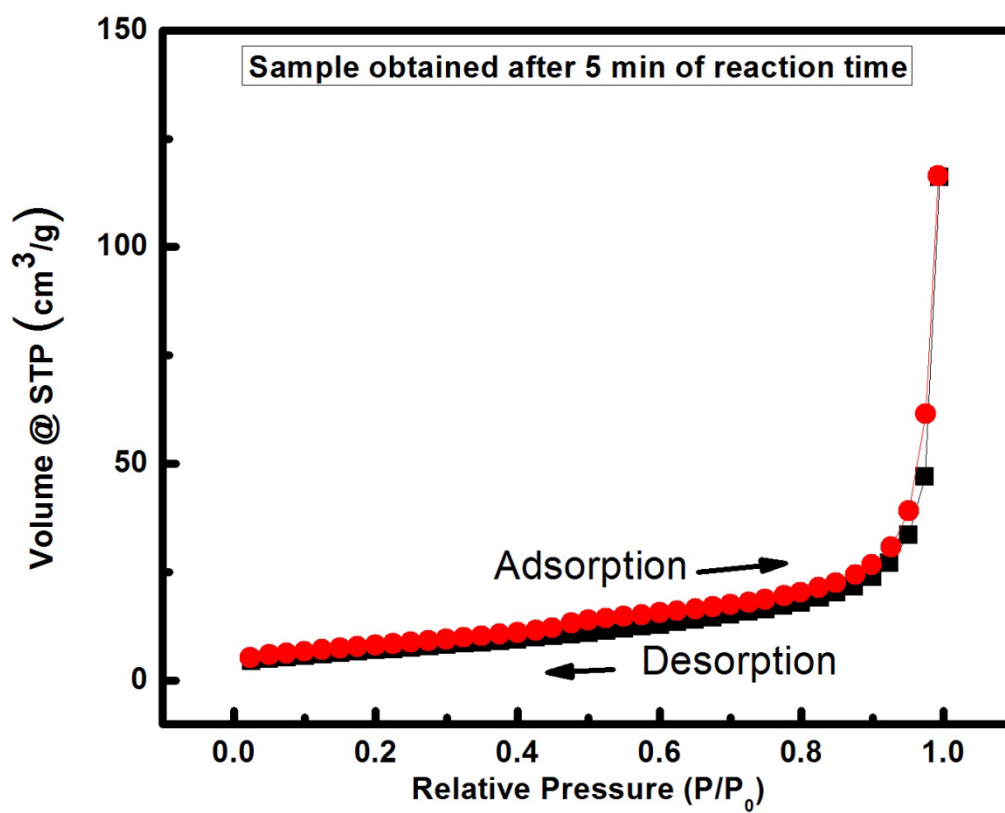

**Figure S2:** Nitrogen adsorption–desorption isotherm at 77 K for the sample obtained for the reaction duration of 5 min.

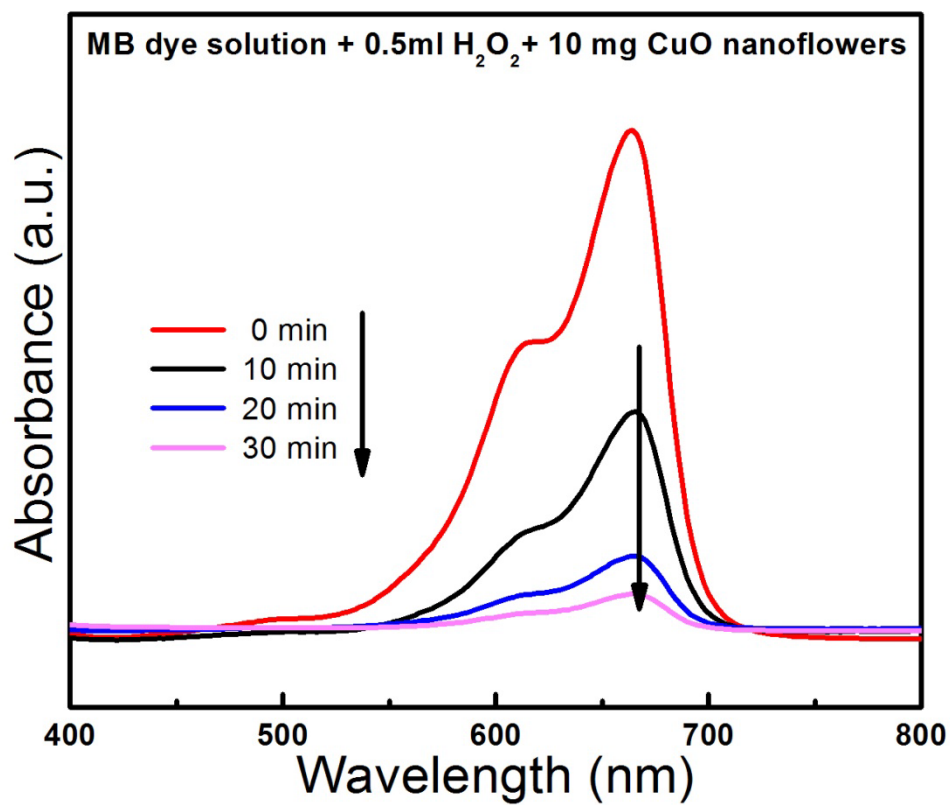

**Figure S3:** UV-vis absorption spectra for MB degradation for different duration for 10 mg nanoflowers of CuO and 0.5 mL H<sub>2</sub>O<sub>2</sub>.

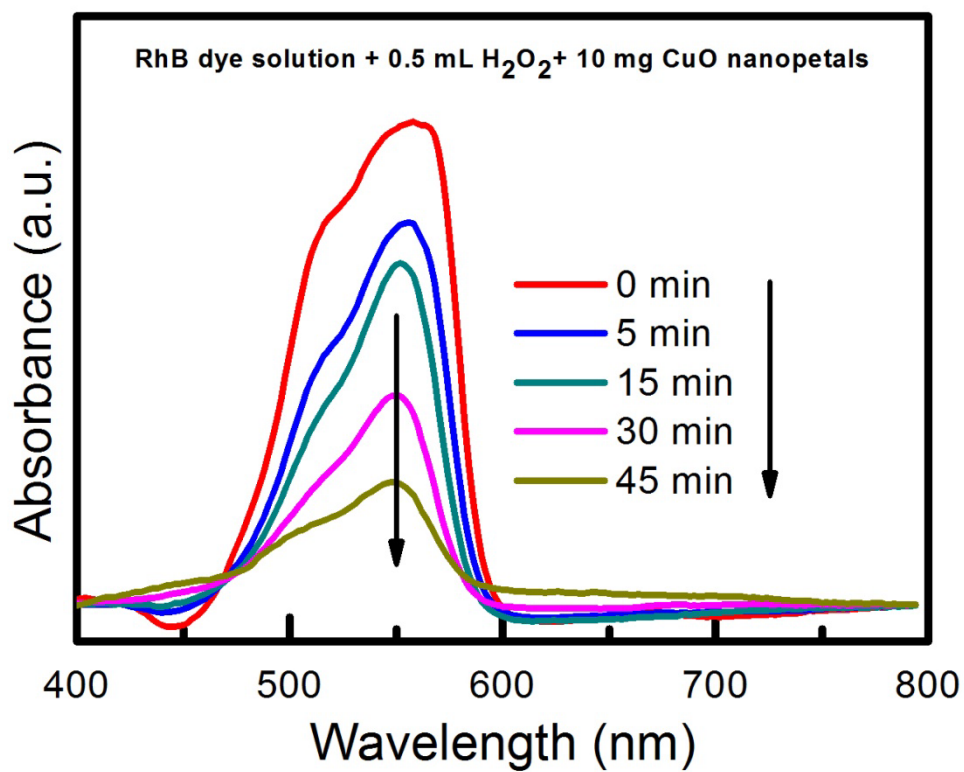

**Figure S4:** UV-vis absorption spectra for RhB degradation for different duration for 10 mg nanopetals of CuO and 0.5 mL H<sub>2</sub>O<sub>2</sub>
